# Supplementary material for: Commercial whey products promote intestinal barrier function with glycomacropeptide enhanced activity in downregulating bacterial endotoxin lipopolysaccharides (LPS)-induced inflammation in vitro
Source: Royal Society of Chemistry journal article supplement (doi:10.1039/d0fo00487a), 2020-01-01
Supplement: d0fo00487a4.pdf [file d0fo00487a4.pdf]

**Table S1.** Proximal composition of whey commercial products

|                          | <b>WPI<sup>a</sup></b> | <b>GOS-W<sup>b</sup></b> | <b>GMP<sup>a</sup></b> |
|--------------------------|------------------------|--------------------------|------------------------|
| <b>Protein (%)</b>       | 97.8                   | 17.5                     | 92.8                   |
| <b>Lactose (%)</b>       | N.D                    | 36.0                     | 0.76                   |
| <b>pH</b>                | 6.9                    | 6.3                      | 6.4                    |
| <b>Moisture (%)</b>      | 4.9                    | 3.0                      | 7.3                    |
| <b>Fat (%)</b>           | 0.3                    | 1.5                      | 0.1                    |
| <b>Ash</b>               | 1.9                    | -                        | 5.9                    |
| <b>Minerals (%)</b>      | -                      | 3.5                      | -                      |
| <b>GOS (%)</b>           | -                      | 27.5                     | -                      |
| <b>GMP, % of protein</b> | -                      | -                        | 94.9                   |

Composition provided by manufacturer. <sup>a</sup>Agropur, <sup>b</sup>FrieslandCampina Ingredients.

**Table S2.** List of primer sequences for pro-inflammatory, tight junction, mucus layer and housekeeping biomarkers

|                     | <b>Gene</b>           | <b>Sequence (5' to 3')</b>                                              |
|---------------------|-----------------------|-------------------------------------------------------------------------|
| <b>Inflammation</b> | NF- $\kappa$ B        | Forward: TGGGAATGGTGAGGTCACTCT<br>Reverse: TCCTGAACTCCAGCACTCTCTTC      |
|                     | TNF- $\alpha$         | Forward: TGTGTGGCTGCAGGAAGAAC<br>Reverse: GCAATTGAAGCACTGGAAAAGG        |
|                     | TLR-4                 | Forward: TGGTGTCCCAGCACTTCATC<br>Reverse: GCCAGGTCTGAGCAATCTCATA        |
|                     | IRAK-1                | Forward: CAGACAGGGAAGGGAAACATTTT<br>Reverse: CATGAAACCTGACTTGCTTCTGAA   |
|                     | <b>Tight Junction</b> | Claudin-1                                                               |
| Occludin            |                       | Forward: CCAATGTCCGAGGAGTGGG<br>Reverse: CGCTGCTGTAACGAGGCT             |
| ZO-1                |                       | Forward: CAAGATAGTTTGGCAGCAAGAGATG<br>Reverse: ATCAGGGACATTCAATAGCGTAGC |
| <b>Mucus layer</b>  | MUC5AC                | Forward: GCAGCTATGTGCTGACCAAG<br>Reverse: GCAGCTCAGCCAGTACAGTG          |
| <b>Housekeeping</b> | $\beta$ -actin        | Forward: GGACTTCGAGCAAGAGATGG<br>Reverse: AGCACTGTGTTGGCGTACAG          |

Nuclear factor kappa B (NF- $\kappa$ B), tumor necrosis factor alpha (TNF- $\alpha$ ), toll like receptor 4 (TLR-4), TNF receptor associated factor 6 (TRAF-6), interleukin-1 receptor-associated kinase 1 (IRAK-1), zonula occludens-1 (ZO-1), mucin 5AC (MUC5AC).

**Table S3.** mRNA levels of tight junction genes in HT-29MTX and Caco-2 cells

| Cell line | Genes                 | mRNA levels/<br>mRNA $\beta$ -actin | Control         | TGF- $\beta_1$   | WPI              | GOS-W            | GMP              | p value |
|-----------|-----------------------|-------------------------------------|-----------------|------------------|------------------|------------------|------------------|---------|
| HT29-MTX  | <i>Tight Junction</i> | Claudin-1                           | 1.10 $\pm$ 0.21 | 3.40 $\pm$ 0.48* | 1.40 $\pm$ 0.18  | 1.30 $\pm$ 0.38  | 2.50 $\pm$ 0.17* | 0.0002  |
|           |                       | OCC                                 | 1.10 $\pm$ 0.20 | 1.30 $\pm$ 0.40  | 3.50 $\pm$ 0.54  | 2.20 $\pm$ 0.75  | 3.70 $\pm$ 0.95* | 0.0297  |
|           |                       | ZO-1                                | 0.83 $\pm$ 0.16 | 0.65 $\pm$ 0.11  | 1.90 $\pm$ 0.24  | 2.10 $\pm$ 0.39* | 2.20 $\pm$ 0.61* | 0.0021  |
|           | <i>Mucus Layer</i>    | MUC5AC                              | 0.96 $\pm$ 0.21 | 0.86 $\pm$ 0.20  | 2.10 $\pm$ 0.24* | 0.87 $\pm$ 0.22  | 3.10 $\pm$ 0.43* | <0.0001 |
| Caco-2    | <i>Tight Junction</i> | Claudin-1                           | 0.87 $\pm$ 0.08 | 1.10 $\pm$ 0.17  | 1.60 $\pm$ 0.24* | 0.67 $\pm$ 0.07  | 0.61 $\pm$ 0.22  | 0.0051  |
|           |                       | OCC                                 | 0.85 $\pm$ 0.13 | 1.60 $\pm$ 0.48  | 1.90 $\pm$ 0.45  | 0.96 $\pm$ 0.38  | 0.41 $\pm$ 0.14  | 0.0516  |
|           |                       | ZO-1                                | 1.00 $\pm$ 0.13 | 0.97 $\pm$ 0.05  | 1.30 $\pm$ 0.05  | 0.91 $\pm$ 0.04  | 0.81 $\pm$ 0.14  | 0.0531  |

mRNA levels were analyzed by RT-PCR with  $\beta$ -actin as housekeeping gene. Cells were treated with whey commercial products or TGF- $\beta_1$  (0.06  $\mu$ g/mL) for 24 h as described in detailed in materials and methods. Data are mean  $\pm$  SEM (n  $\geq$  3). Pairwise comparisons against controls not treated with TGF- $\beta_1$  were performed by Dunnett's test. Significant differences are denoted by (\*) p<0.05.
