# Supplementary figures and images for: Commercial whey products promote intestinal barrier function with glycomacropeptide enhanced activity in downregulating bacterial endotoxin lipopolysaccharides (LPS)-induced inflammation in vitro
Source: Royal Society of Chemistry journal article supplement (doi:10.1039/d0fo00487a), 2020-01-01

Control TGF- $\beta_1$  WPI GOS-W GMP

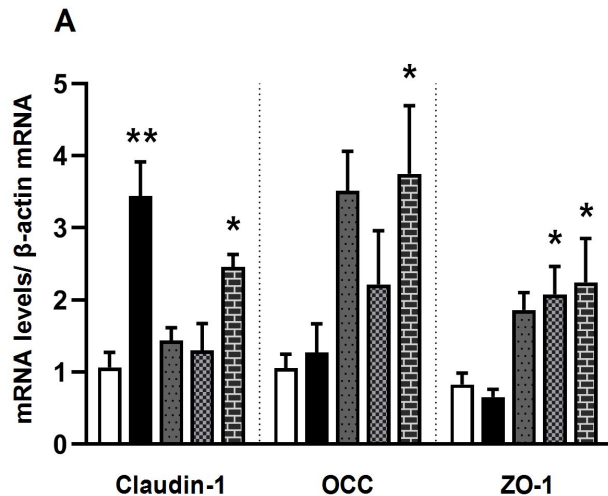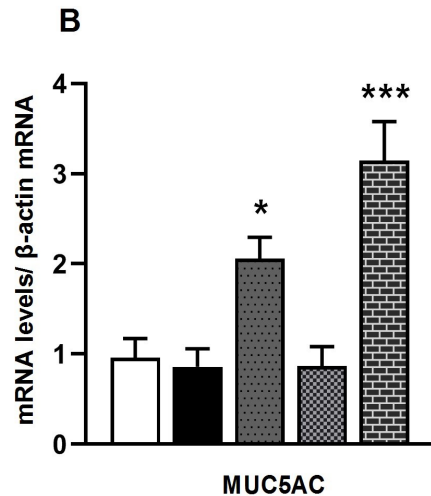

Supplement: d0fo00487a3.pdf [file d0fo00487a3.pdf]
